# Supplementary material for: APOL1 C-Terminal Variants May Trigger Kidney Disease through Interference with APOL3 Control of Actomyosin
Source: PubMed Central journal article supplement — Cell Rep. 2020 Mar 17;30(11):3821–3836.e13. doi: 10.1016/j.celrep.2020.02.064 (PMC7090385; doi:10.1016/j.celrep.2020.02.064), 2020-03-17
Supplement: mmc1.pdf [file mmc1.pdf]

**Supplemental Information**

**APOL1 C-Terminal Variants May Trigger**

**Kidney Disease through Interference**

**with APOL3 Control of Actomyosin**

**Sophie Uzureau, Laurence Lecordier, Pierrick Uzureau, Dorle Hennig, Jonas H. Graversen, Fabrice Homblé, Pepe Ekulu Mfutu, Fanny Oliveira Arcolino, Ana Raquel Ramos, Rita M. La Rovere, Tomas Luyten, Marjorie Vermeersch, Patricia Tebabi, Marc Dieu, Bart Cuypers, Stijn Deborggraeve, Marion Rabant, Christophe Legendre, Søren K. Moestrup, Elena Levchenko, Geert Bultynck, Christophe Erneux, David Pérez-Morga, and Etienne Pays**

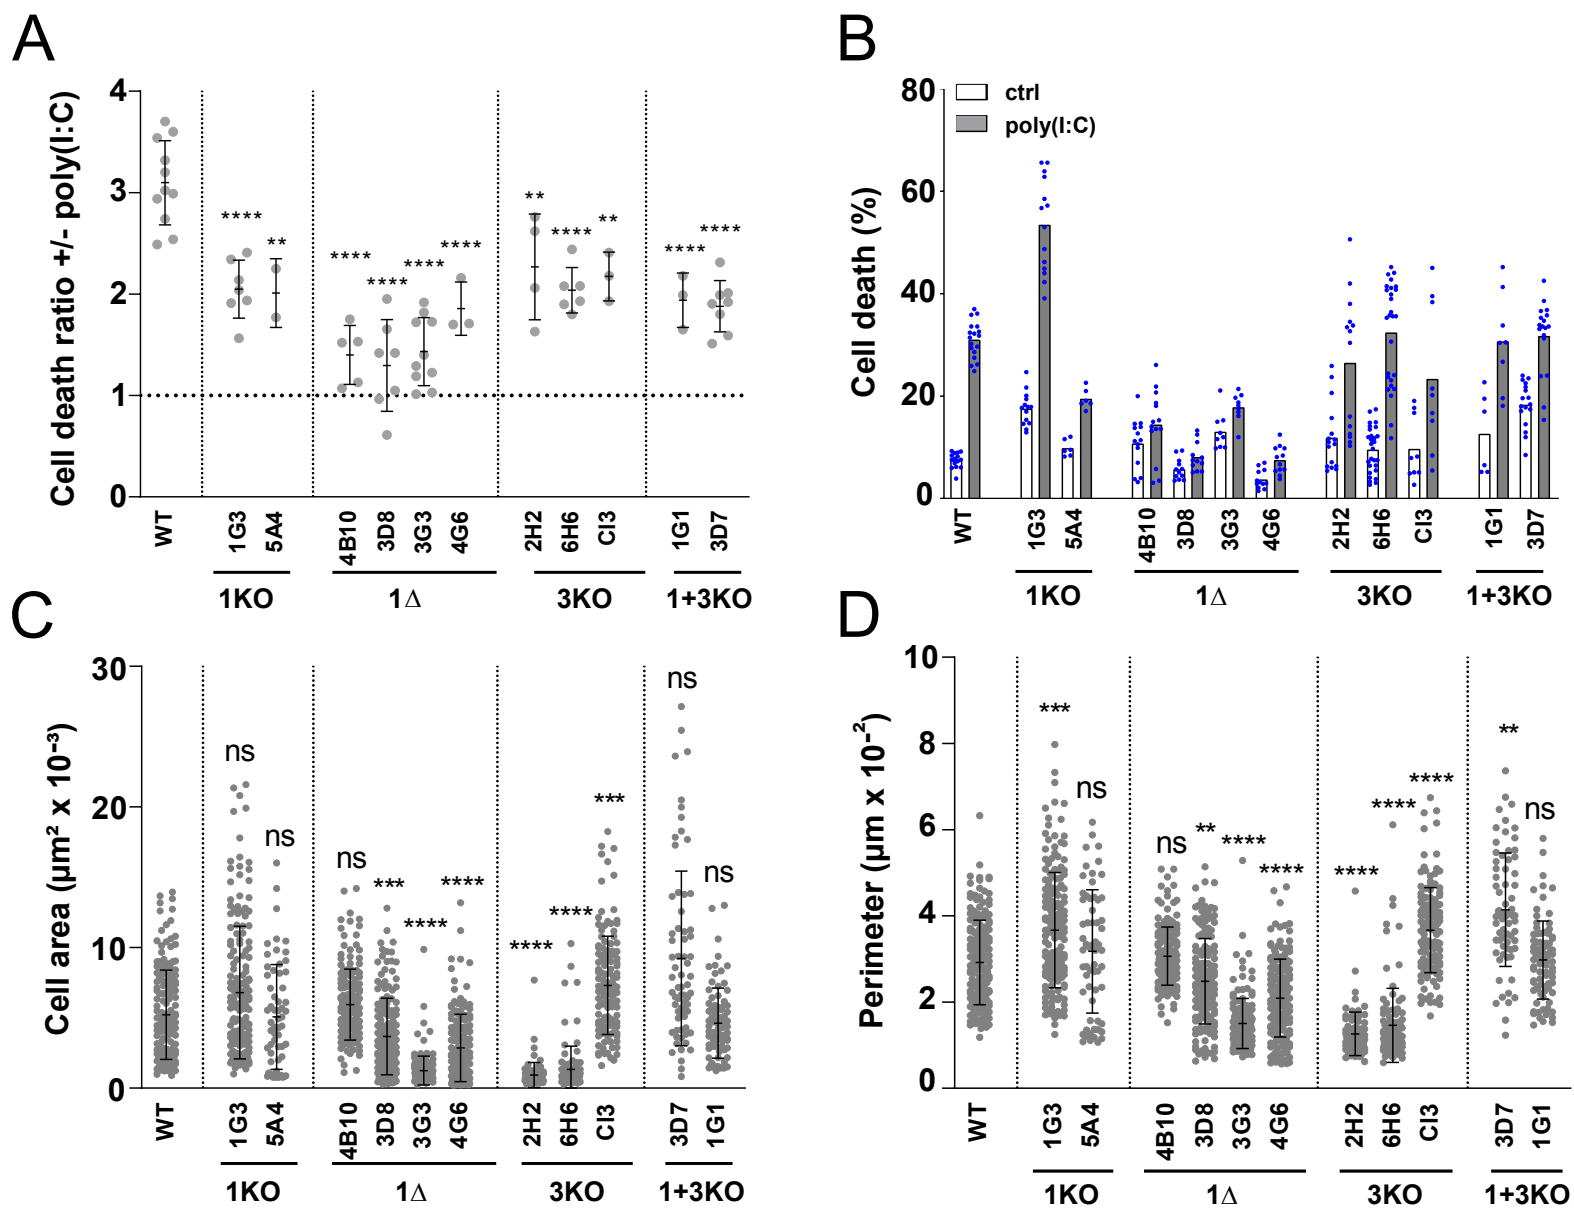

Fig. S1

**Figure S1. Editing of *APOL1* and/or *APOL3* affects the phenotype of independent podocyte clones (related to Figures 1 and 2)**

(A) Poly(I:C)-induced cell death in different clones of the various podocyte lines. WT, n = 11;

1KO 1G3, n = 7; 1KO 5A4, n = 2; 1Δ 4B10, n = 5; 1Δ 3D8, n = 7; 1Δ 3G3, n = 10; 1Δ 4G6, n = 3; 3KO 2H2, n = 4; 3KO 6H6, n = 6; 3KO CI3, n = 3; 1+3KO 1G1, n = 3; 1+3KO 3D7, n = 8.

(B) Raw data of the poly(I:C)-mediated podocyte cell death measurements presented in Figs.

1C and Fig. S1A (ctrl= untreated control). Ctrl : WT, n = 15; 1KO 1G3, n = 14; 1KO 5A4, n = 6; 1Δ 4B10, n = 14; 1Δ 3D8, n = 12; 1Δ 3G3, n = 9; 1Δ 4G6, n = 12; 3KO 2H2, n = 16; 3KO 6H6, n = 28; 3KO CI3, n = 9; 1+3KO 1G1, n = 6; 1+3KO 3D7, n = 16. Poly(I:C) : WT, n = 18; 1KO 1G3, n = 14; 1KO 5A4, n = 6; 1Δ 4B10, n = 14; 1Δ 3D8, n = 12; 1Δ 3G3, n = 9; 1Δ 4G6, n = 12; 3KO 2H2, n = 16; 3KO 6H6, n = 28; 3KO CI3, n = 9; 1+3KO 1G1, n = 8; 1+3KO 3D7, n = 16.

(C) Cellular area of the different podocyte cell lines. WT, n = 179; 1KO 1G3, n = 168; 1KO

5A4, n = 61; 1Δ 4B10, n = 159; 1Δ 3D8, n = 157; 1Δ 3G3, n = 161; 1Δ 4G6, n = 158; 3KO 2H2, n = 87; 3KO 6H6, n = 102; 3KO CI3, n = 130; 1+3KO 3D7, n = 68; 1+3KO 1G1, n = 84.

(D) Cellular perimeter of the different podocyte cell lines. Same n values as panel C.

All quantitative results are expressed as means +/- SD.

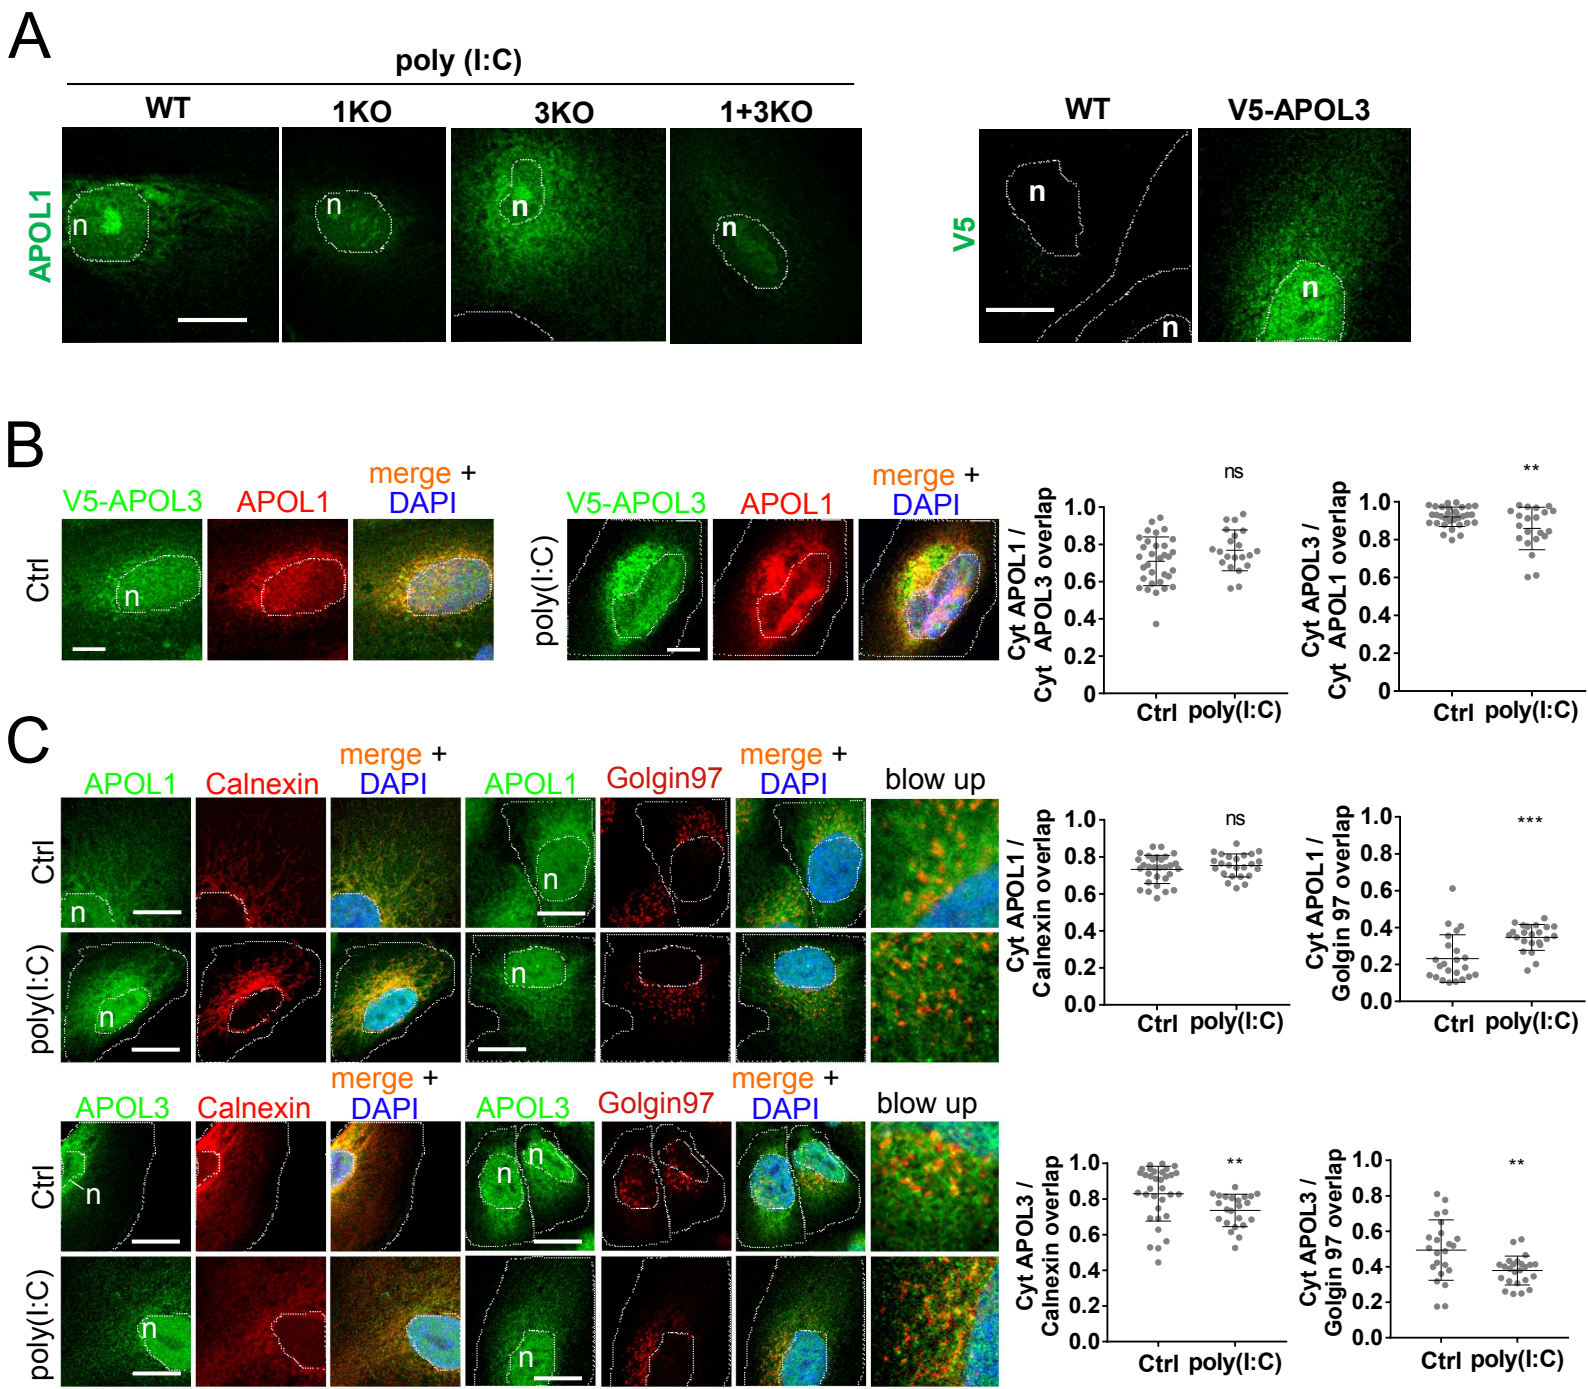

Fig. S2

**Figure S2. APOL1 and APOL3 exhibit important co-localization with ER and Golgi membranes (related to Figures 1 and 2)**

- (A) Specificity of the immunolabelling with the anti-APOL1 and anti-V5 antibodies, as revealed by the strong reduction of staining, particularly cytoplasmic, with the anti-APOL1 antibody in the APOL1KO or APOL1+3KO cells, and by the absence of staining with the anti-V5 antibody in non-V5 tagged WT cells. Anti-V5 antibodies label C-terminal V5-tagged APOL3.
- (B) Immunofluorescence analysis of APOL1 and APOL3 co-localization. The graphs show the co-localization levels of cytoplasmic APOL1 and V5-APOL3, following removal of the APOL staining covered with the nuclear DAPI marker (error bars = SD). ctrl, n = 32; poly(I:C), n = 21.
- (C) Immunofluorescence analysis of APOL1 and APOL3 distribution with respect to ER and *trans*-Golgi markers (Calnexin and Golgin97, respectively). The graphs show the co-localization levels of cytoplasmic APOLs with ER or *trans*-Golgi markers, following removal of the APOL staining covered with the nuclear DAPI marker (error bars = SD). CytAPOL1/ Calnexin panel : ctrl, n = 30; poly(I:C), n = 24. CytAPOL1/ Golgin97 panel : ctrl, n = 23; poly(I:C), n = 23. CytAPOL3/ Calnexin panel : ctrl, n = 33; poly(I:C), n = 23. CytAPOL3/ Golgin97 panel : ctrl, n = 23; poly(I:C), n = 24.
- Cells were randomly selected from 3 independent experiments (ctrl = untreated cells; n = nucleus; scale bars = 20  $\mu$ m). In all images, the nuclear and cellular contours are indicated by dotted lines; when absent, these contours are outside the image surface.

## APOL1

CRISPR  
▼

MEGAALLRVSVLCIWMSALFLGVRVRAEEAGARVQQNVPSGTDGDPQSKPLGDWAAGTMDPESSIFIEDAIKYFKEKVS IQNLLLLLTDNEAWNGFVAAAE  
LPRNEADELRKALDNLARQMIMKDKNWHDKGQQYRNWFLKEFPRLKSKLEDNIRRLRALADGVQKVHKGTTIANVVSGLSISGILTTLVGMGLAPFTEGGS  
LVLLEPGMELGITAALTGITSSTIDYGKKWWTQAQAHDLVIKSLDKLKEVKEFLGENISNFLSLAGNTYQLTRGIGKDIRALRRARANLQSVPHASASRPRV  
TEPISAESGEQVERVNEPSILEMSRGVKLTDVAPVSFFLVLDVVYLVYESKHLHEGAKSETAEELKKVAQELEEKLNILNNNYKILQADQEL

▲  
CRISPR

## APOL3

CRISPR  
▼

MDSEKKRFTEEATKYFRERVSPVHLQIILLTNNEAWKRFVTAELPRDEADALYEALKKLRTYAAIEDEYVQQKDEQFREWFLKEFPQVKRKIQESIEKLRAL  
ANGIEEVHRGCTISNVVSSSTGAASGIMSLAGLVLPFTAGTSLALTAAGVGLGAASAVTGITTSIVEHSYTSSAEAEASRLTATSIDRLKVFEVMDITP  
NLLSLLNNYEATQTIGSEIRAIRQARARARLPVTTWRISAGSGGQAERTIAGTTRAVSRGARILSATTSGIFLALDVVNLVYESKHLHEGAKSASAEELRR  
QAQELEENLMELTQIYQRLNCPCHTH

| Cell line                            | Allele 1                                                                                                                                                         | Allele 2                                                                                                                                                         |
|--------------------------------------|------------------------------------------------------------------------------------------------------------------------------------------------------------------|------------------------------------------------------------------------------------------------------------------------------------------------------------------|
| APOL1KO<br>clone 1G3                 | RVQQNVPSGTDGDPQSKPLG ALGCWHHGPR *                                                                                                                                | RVQQNVPSGTDGDPQSKPLG ALGCWHHGPR *                                                                                                                                |
| APOL1KO<br>clone 5A4                 | RVQQNVPSGTDGDPQSKPLGD KFTPLIILT *                                                                                                                                | WT                                                                                                                                                               |
| APOL1Δ<br>clone 4B10                 | VLDVVYLV RIKALT*                                                                                                                                                 | VLDVVYLV RIKALT*                                                                                                                                                 |
| APOL1Δ<br>clone 3D8 (hom)            | VLDVVYLV RIKALT*                                                                                                                                                 | VLDVVYLV VRIKALT*                                                                                                                                                |
| APOL1Δ<br>clone 3G3 (het)            | VLDVVYLV -<br>SKHLHEGAKSETAEELKKVAQELEEKLNILNNNYKILQADQEL*                                                                                                       | VLDVVYLV VRIKALT*                                                                                                                                                |
| APOL1Δ<br>clone 4G6                  | VLDVVYLV QSTYMRGQSQRQLRS*                                                                                                                                        | VLDVVYLV QSTYMRGQSQRQLRS*                                                                                                                                        |
| APOL3KO<br>clone 2H2                 | DEADALYEALKKLRTYAA SRMFPVIQPLPLSLPILHTGPICPVRT*                                                                                                                  | DEADALYEALKKLRTYAA SRMFPVIQPLPLSLPILHTGPICPVRT*                                                                                                                  |
| APOL3KO<br>clone 6H6                 | DEADALYEALKKLR T MRTNMCSRKMSSLGNGF*                                                                                                                              | DEADALYEALKKLR T FRTNMCSRKMSSLGNGF*                                                                                                                              |
| APOL3KO<br>clone 3                   | DEADALYEALKKLRTYAA IEDEYVQQKDEQFREWFLKEFPQVKR<br>KIQESIEKLRALANGIEEVHRGCTISNVVSSSTGAASGIMSLAGLV<br>LAPFTAGTSLALTAAGVGLGAASAVTGITTSIVEHSYTSSAEAEAS<br>RLTATSIDR * | DEADALYEALKKLRTYAA IEDEYVQQKDEQFREWFLKEFPQVKR<br>KIQESIEKLRALANGIEEVHRGCTISNVVSSSTGAASGIMSLAGLV<br>LAPFTAGTSLALTAAGVGLGAASAVTGITTSIVEHSYTSSAEAEAS<br>RLTATSIDR * |
| APOL1KO (1G3) +<br>APOL3KO clone 1G1 | DEADALYEALKKLRTYA *                                                                                                                                              | DEADALYEALKKLRTYA *                                                                                                                                              |
| APOL1KO (1G3) +<br>APOL3KO clone 3D7 | DEADALYEALKKLRTYAA PRPLAPSPKPPDSPLQALPCPPHPLRLQV<br>SSTSSRCDD*                                                                                                   | DEADALYEALKKLRTYAA PRPLAPSPKPPDSPLQALPCPPHPLRLQV<br>SSTSSRCDD*                                                                                                   |

Fig. S3

**Figure S3. CRISPR/Cas9 editing of podocytes (related to all Figures)**

In the APOL1 and APOL3 sequences, the coloured sections were edited in different podocyte cell lines as shown in the table.

**A**

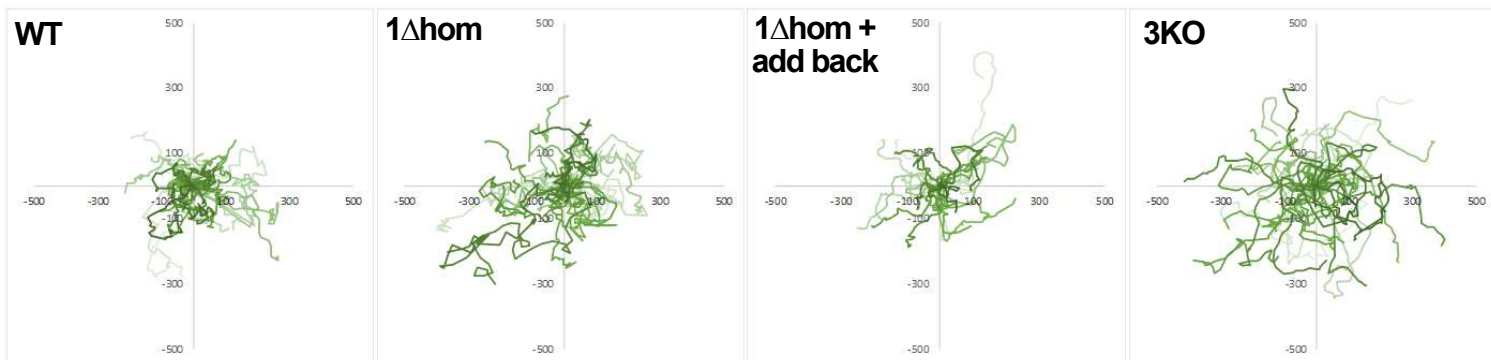

**B**

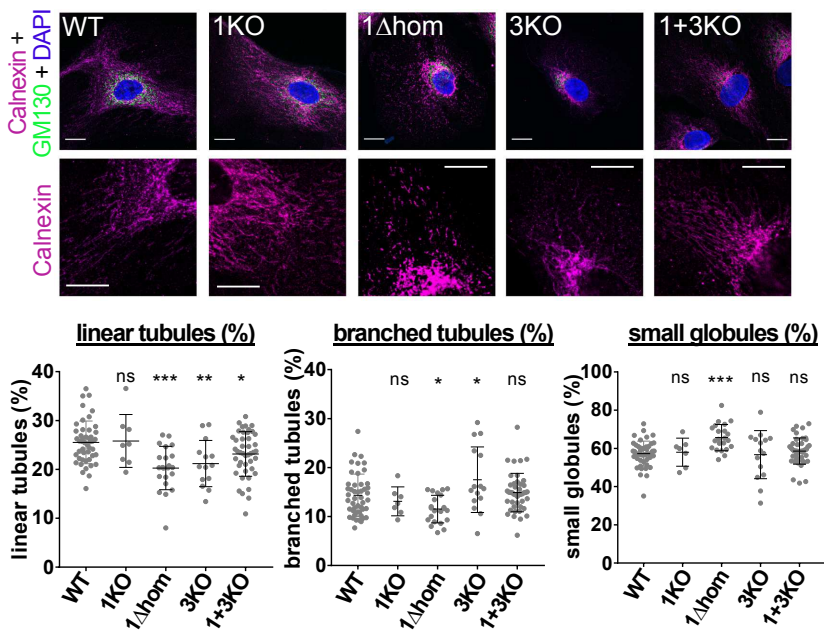

**C**

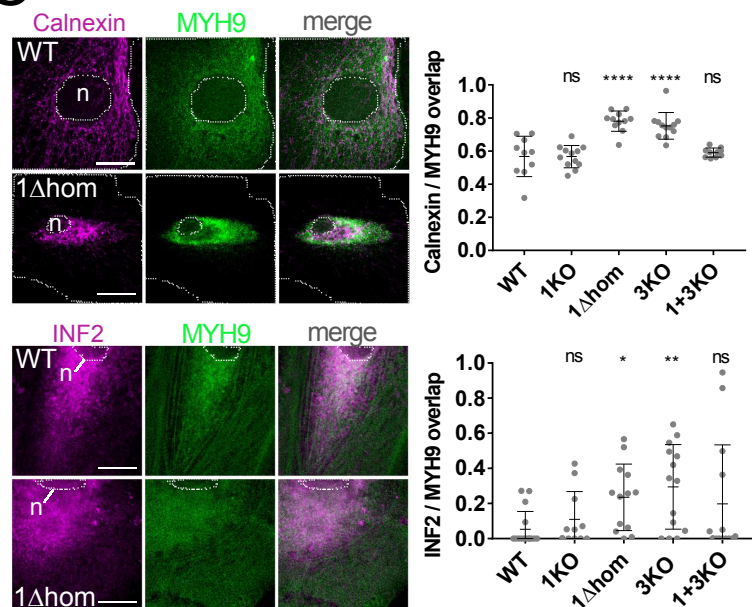

Fig. S4



**Figure S4. Effect of *APOL* editing on actomyosin organization: additional information**

**(related to Figure 2)**

(A) Cellular motility, as determined by single cell tracking of 30 randomly selected podocytes.

The mobility of APOL1 $\Delta$ hom podocytes was analysed following or not doxycycline-inducible addback expression of WT APOL1.

(B) ER shape, as determined by measurement of calnexin-immunostained structures using

MicroP software. WT, n = 47; 1KO, n = 8; 1 $\Delta$ hom, n = 22; 3KO, n = 14; 1+3KO, n = 44.

(C) Relative co-localization of the ER marker calnexin and INF2 with MYH9. Calnexin /

MYH9 panel: WT, n = 10; 1KO, n = 11; 1 $\Delta$ hom, n = 12; 3KO, n = 12; 1+3KO, n = 10.

INF2 / MYH9 panel: WT, n = 16; 1KO, n = 13; 1 $\Delta$ hom, n = 11; 3KO, n = 14; 1+3KO, n = 14.

Size bars = 2  $\mu$ m. All quantitative measurements are expressed as means +/- SD.

**A**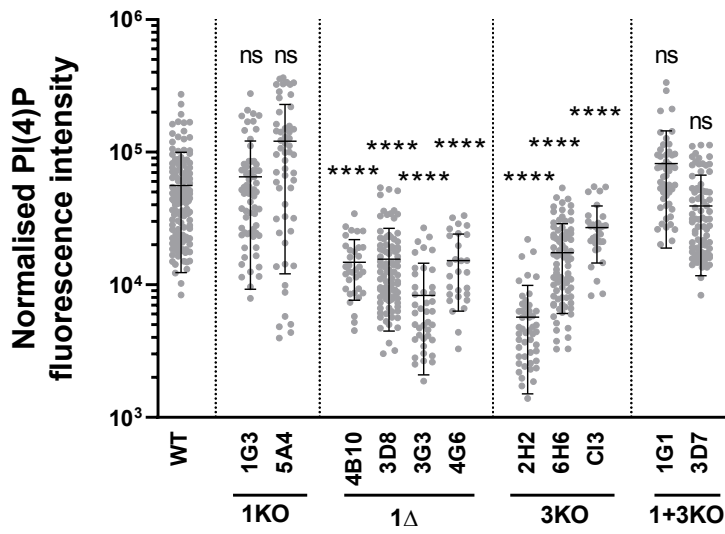**B**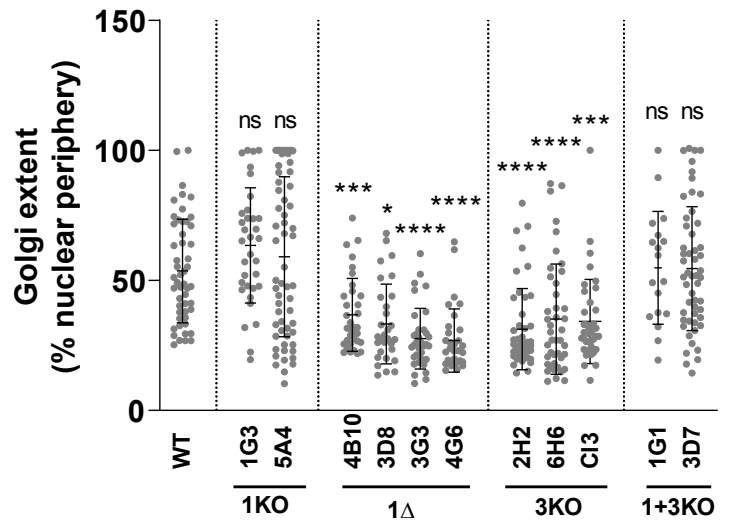**C**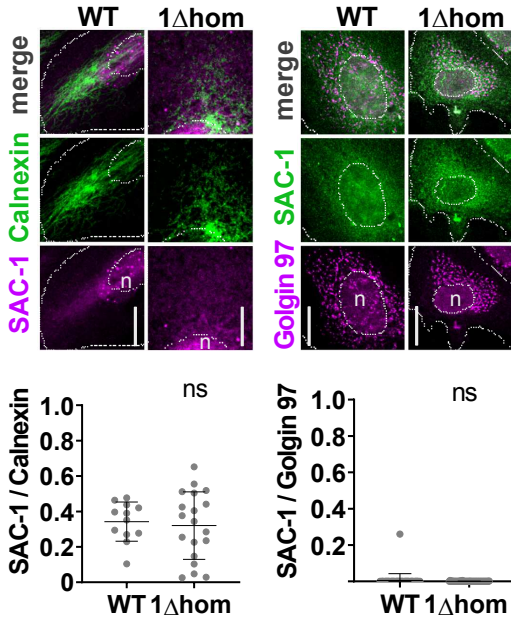**D**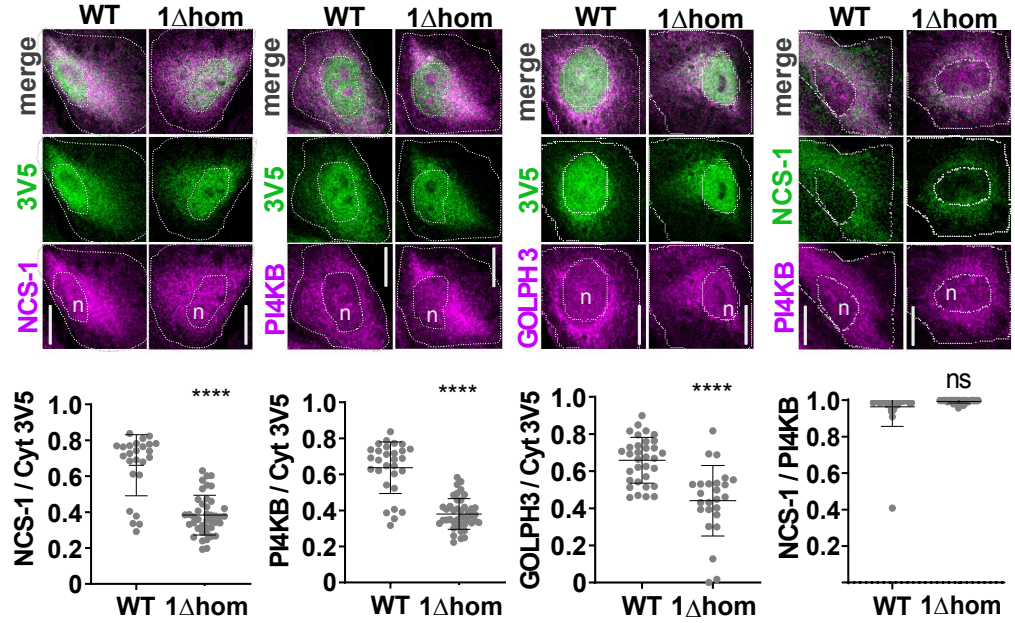

Fig. S5

**Figure S5. Effect of *APOL* editing on PI4KB activity: additional information (related to Figure 3)**

- (A) Relative PI(4)P content in different clones of the APOL1 $\Delta$  and APOL3KO cell lines, as determined by immunofluorescence with anti-PI(4)P antibodies. WT, n = 51; 1KO 1G3, n = 34; 1KO 5A4, n = 60; 1 $\Delta$  4B10, n = 34; 1 $\Delta$  3D8, n = 30; 1 $\Delta$  3G3, n = 35; 1 $\Delta$  4G6, n = 32; 3KO 2H2, n = 45; 3KO 6H6, n = 43; 3KO CI3, n = 38; 1+3KO 1G1, n = 18; 1+3KO 3D7, n = 53.
- (B) Relative Golgi extent in different clones of the APOL1 $\Delta$  and APOL3KO cell lines, as determined by immunofluorescence with anti-Golgin97 antibodies. WT, n = 143; 1KO 1G3, n = 68; 1KO 5A4, n = 55; 1 $\Delta$  4B10, n = 34; 1 $\Delta$  3D8, n = 92; 1 $\Delta$  3G3, n = 41; 1 $\Delta$  4G6, n = 28; 3KO 2H2, n = 49; 3KO 6H6, n = 83; 3KO CI3, n = 31; 1+3KO 1G1, n = 51; 1+3KO 3D7, n = 82.
- (C) Relative co-localization of the PI(4)P phosphatase SAC-1 with the ER marker Calnexin and *trans*-Golgi marker Golgin97 in WT and APOL1 $\Delta$  cells. SAC-1 / Calnexin panel: WT, n = 12; 1 $\Delta$ hom, n = 19. SAC-1 / Golgin97 panel: WT, n = 49; 1 $\Delta$ hom, n = 55.
- (D) Relative co-localization of NCS-1, PI4KB and the *trans*-Golgi marker GOLPH3 with cytoplasmic V5-tagged APOL3, and between NCS-1 and PI4KB in WT and APOL1 $\Delta$  cells. NCS-1 / Cyt 3V5 panel: WT, n = 25; 1 $\Delta$ hom, n = 42. PI4KB / Cyt 3V5 panel: WT, n = 29; 1 $\Delta$ hom, n = 43. GOLPH3 / Cyt 3V5 panel: WT, n = 33; 1 $\Delta$ hom, n = 25. NCS-1 / PI4KB panel: WT, n = 30; 1 $\Delta$ hom, n = 41.

Size bars = 2  $\mu$ m. All quantitative measurements are expressed as means +/- SD.

A

| Protein                                              | Uniprot Reference | Molecular weight | WT | WT + poly (I:C) | 1KO | 1KO + poly (I:C) | 1Δhom | 1Δhom + poly (I:C) | 3KO | 3KO + poly (I:C) |
|------------------------------------------------------|-------------------|------------------|----|-----------------|-----|------------------|-------|--------------------|-----|------------------|
| MYH9                                                 | P35579            | 216 kDa          | 28 | 89              | 11  | 25               | 33    | 88                 | 7   | 85               |
| MYO6                                                 | Q9UM54            | 145 kDa          | 0  | 36              | 0   | 0                | 0     | 17                 | 0   | 11               |
| MYO1C                                                | O00159            | 122 kDa          | 4  | 18              | 0   | 2                | 4     | 9                  | 0   | 5                |
| Gelsolin                                             | B7Z6N2            | 85 kDa           | 2  | 17              | 0   | 0                | 8     | 11                 | 0   | 10               |
| Drebrin                                              | Q16643            | 71 kDa           | 0  | 14              | 0   | 0                | 0     | 6                  | 0   | 5                |
| MYL9 or MYL12A (RLC)                                 | Q6IBG1/J3QRS3     | 20 kDa/20 kDa    | 2  | 11              | 0   | 5                | 5     | 15                 | 6   | 10               |
| Coatomer subunit alpha                               | P53621            | 138 kDa          | 4  | 10              | 0   | 0                | 2     | 6                  | 0   | 0                |
| MYO5B                                                | Q9ULV0            | 214 kDa          | 0  | 10              | 0   | 0                | 0     | 7                  | 0   | 0                |
| Tropomyosin (unique peptides)                        | see panel B       | 12 kDa           | 2  | 8               | 0   | 0                | 22    | 76                 | 3   | 48               |
| Protein phosphatase 1 regulatory subunit             | B2RAH5            | 115 kDa          | 0  | 8               | 0   | 0                | 0     | 7                  | 0   | 0                |
| MYL6 (ELC)                                           | H0Y43             | 29 kDa           | 6  | 7               | 0   | 6                | 8     | 14                 | 4   | 11               |
| MYO1D                                                | O94832            | 116 kDa          | 2  | 7               | 0   | 0                | 0     | 5                  | 0   | 7                |
| Leucine-rich repeat flightless-interacting protein 2 | Q9Y608            | 82 kDa           | 0  | 7               | 0   | 0                | 0     | 4                  | 0   | 0                |
| MYO1E                                                | Q12965            | 127 kDa          | 5  | 6               | 4   | 6                | 0     | 2                  | 0   | 0                |
| Myosin phosphatase Rho-interacting protein (MPRIIP)  | H0Y2S9            | 203 kDa          | 0  | 5               | 0   | 0                | 0     | 10                 | 0   | 5                |
| Protein flightless-1 homolog                         | Q13045            | 145 kDa          | 0  | 5               | 0   | 0                | 0     | 2                  | 0   | 0                |
| collagen alpha-1(I) chain                            | P02452            | 133 kDa          | 0  | 5               | 0   | 0                | 0     | 0                  | 0   | 0                |
| 60S ribosomal protein L28                            | H0YKD8            | 19 kDa           | 2  | 4               | 0   | 0                | 3     | 4                  | 0   | 2                |
| Ankyrin                                              | Q9P0K7            | 110 kDa          | 0  | 4               | 0   | 0                | 2     | 13                 | 0   | 3                |
| Coatomer subunit beta                                | P35606            | 102 kDa          | 0  | 4               | 0   | 0                | 0     | 4                  | 0   | 0                |
| <b>Apolipoprotein L 1 (APOL1)</b>                    | B2R9E5            | 41/38 kDa        | 0  | 4               | 0   | 0                | 0     | 2                  | 2   | 9                |

B

|                                            | Uniprot Reference | WT | WT + poly (I:C) | 1KO | 1KO + poly (I:C) | 1Δhom | 1Δhom + poly (I:C) | 3KO | 3KO + poly (I:C) |
|--------------------------------------------|-------------------|----|-----------------|-----|------------------|-------|--------------------|-----|------------------|
| tropomyosin alpha-3 chain isoform Tpm3.1cy | B2RDE1            | 0  | 4               | 0   | 0                | 4     | 23                 | 0   | 14               |
| tropomyosin alpha-4 chain isoform Tpm4.2cy | B4DVY2            | 2  | 5               | 0   | 0                | 7     | 18                 | 0   | 14               |
| tropomyosin beta chain isoform Tpm2.4      | B4E3P1            | 0  | 0               | 0   | 0                | 0     | 19                 | 0   | 14               |
| Tropomyosin alpha-1 chain isoform Tpm1.9cy | H7BYY1            | 0  | 0               | 0   | 0                | 0     | 26                 | 0   | 17               |
| tropomyosin beta chain isoform Tpm2.3      | P07951-3          | 0  | 0               | 0   | 0                | 0     | 15                 | 0   | 11               |
| tropomyosin alpha-1 chain isoform Tpm1.3sm | P09493-8          | 0  | 0               | 0   | 0                | 9     | 27                 | 0   | 15               |

C

| GO biological process                     | Fold enrichment | +/- | P Value  |
|-------------------------------------------|-----------------|-----|----------|
| Actin filament-based process (GO:0030029) | 13.87           | +   | 5.02E-04 |
| Vesicle-mediated transport (GO:0016192)   | 5.86            | +   | 1.41E-03 |
| Cellular localization (GO:0051641)        | 5.76            | +   | 8.68E-05 |

  

| GO molecular function           | H. sapiens | Found | Expected | enrichment | +/- | P value  |
|---------------------------------|------------|-------|----------|------------|-----|----------|
| Microfilament motor activity    | 22         | 6     | 0.03     | >100       | +   | 6.04E-10 |
| Actin-dependent ATPase activity | 12         | 3     | 0.01     | >100       | +   | 1.11E-03 |
| Motor activity                  | 135        | 6     | 0.16     | 37.28      | +   | 2.96E-05 |
| Actin filament binding          | 137        | 6     | 0.16     | 36.74      | +   | 3.22E-05 |
| Calmodulin binding              | 188        | 7     | 0.22     | 31.23      | +   | 5.06E-06 |
| Actin binding                   | 404        | 11    | 0.48     | 22.84      | +   | 1.23E-09 |
| Cadherin binding                | 294        | 7     | 0.35     | 19.97      | +   | 1.07E-04 |
| Cell adhesion molecule binding  | 449        | 7     | 0.54     | 13.08      | +   | 1.84E-03 |
| Cytoskeletal protein binding    | 853        | 11    | 1.02     | 10.82      | +   | 3.44E-06 |
| Unclassified                    | 3792       | 2     | 5.52     | 0.44       | -   | 0.00E00  |

Fig. S6

**Figure S6. APOL1 is associated with actomyosin components (related to Figure 2)**

(A) Mass spectrometry analysis of proteins co-immunoprecipitated with anti-APOL1 antibodies in different podocyte cell lines, incubated or not with poly(I:C). The immunoprecipitates were treated with 1% NP-40.

(B) Details of tropomyosin isoforms immunoprecipitated with APOL1 (peptides common to different isoforms are listed several times).

(C) Functional analysis of immunoprecipitated components.



**Figure S7. Y2H screening for APOL1-interacting proteins mostly reveals intramolecular interactions (related to Figure 4)**

(A) cDNA was synthesized on pooled poly(A)<sup>+</sup> RNA (50:50) from untreated and poly(I:C)-treated podocytes.

(B) The podocyte cDNA library was cloned in a prey vector and transfected in *Saccharomyces cerevisiae*.

(C) Different regions of the APOL1 sequence in a bait vector were used for the screening of podocyte interacting sequences. For bait 1 and bait 2, respectively 57.5 million interactions in the presence of 5 mM HIS3 inhibitor 3-amino-1,2,4-triazole (3-AT) and 67.6 million interactions in 0.5 mM 3-AT were analysed.

(D) List of the genes identified following the screening with the different baits (SID = smallest interacting domain; score: A = very high, B = high, C = good and D = moderate confidence in the interaction).

(E) Sequence comparison of the APOL1 and APOL2 SIDs (asterisks = identical amino acids; underlined violet amino acids: hydrophobic residues in HCs; underlined pink amino acids: positions “a” and “d” of heptads in LZs).

**A**

| Interaction Matrix |                  |            |                   | Selection Medium |      |                |                |                 |                 |                  |                  |
|--------------------|------------------|------------|-------------------|------------------|------|----------------|----------------|-----------------|-----------------|------------------|------------------|
| N° / Type          | Bait*            | Prey**     |                   | DO-2             | DO-3 | DO-3 + 1mM 3AT | DO-3 + 5mM 3AT | DO-3 + 10mM 3AT | DO-3 + 50mM 3AT | DO-3 + 100mM 3AT | DO-3 + 200mM 3AT |
| 1                  | Positive control | smad       | smurf             | +                | +    | +              | +              | +               | +               | +                | +                |
| 2                  | Negative control | pB27ø      | pP7ø              | +                | -    | -              | -              | -               | -               | -                | -                |
| 3                  | Negative control | pB27ø      | APOL1 Cter wt     | +                | -    | -              | -              | -               | -               | -                | -                |
| 4                  | Negative control | APOL1 Nter | pP7ø              | +                | -    | -              | -              | -               | -               | -                | -                |
| 5                  | Interaction      | APOL1 Nter | APOL1 Cter wt     | +                | +    | +              | +              | +               | +               | +                | +                |
| 6                  | Negative control | pB27ø      | APOL1 Cter Mut G1 | +                | -    | -              | -              | -               | -               | -                | -                |
| 7                  | Interaction      | APOL1 Nter | APOL1 Cter Mut G1 | +                | +    | +              | +              | +               | +               | +                | +                |
| 8                  | Negative control | pB27ø      | APOL1 Cter Mut G2 | +                | -    | -              | -              | -               | -               | -                | -                |
| 9                  | Interaction      | APOL1 Nter | APOL1 Cter Mut G2 | +                | +    | +              | +              | +               | +/-             | -                | -                |

\* APOL1 Nter : [aa 60-187]

\*\* APOL1 Cter : [aa 236-398/396]

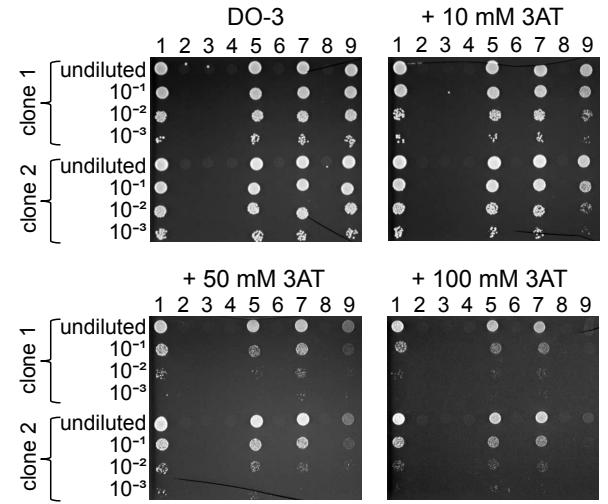

**B**

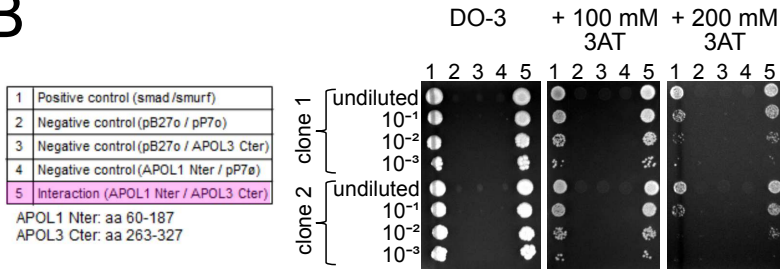

**C**

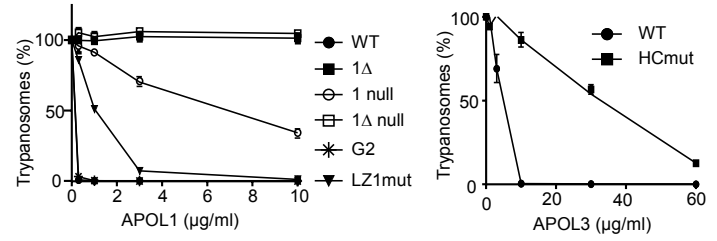

**D**

| Interaction Matrix |                  |              | Selection Medium |      |
|--------------------|------------------|--------------|------------------|------|
| N° / Type          | Bait             | Prey         | DO-2             | DO-3 |
| 1                  | Positive control | smad         | +                | +    |
| 2                  | Negative control | pB27ø        | +                | -    |
| 3                  | Negative control | APOL1 LZ1mut | +                | -    |
| 4                  | Interaction      | APOL1 LZ1mut | +                | -    |
| 5                  | Negative control | pB27ø        | +                | -    |
| 6                  | Interaction      | APOL1 LZ1mut | +                | -    |
| 7                  | Negative control | pB27ø        | +                | -    |
| 8                  | Interaction      | APOL1 LZ1mut | +                | -    |

APOL1 LZ1mut: L111Q/L115Q/L118Q ( aa 60-187)

**E**

| Interaction Matrix |                  |                 | Selection Medium |      |
|--------------------|------------------|-----------------|------------------|------|
| N° / Type          | Bait             | Prey            | DO-2             | DO-3 |
| 1                  | Positive control | smad            | +                | +    |
| 2                  | Negative control | APOL3 null mut  | +                | -    |
| 3                  | Negative control | APOL1 null mut  | +                | -    |
| 4                  | Negative control | APOL1Δ null mut | +                | -    |
| 5                  | Negative control | pB27ø           | +                | -    |
| 6                  | Interaction      | APOL3 null mut  | +                | +    |
| 7                  | Interaction      | APOL1 null mut  | +                | -    |
| 8                  | Interaction      | APOL1Δ null mut | +                | -    |

APOL3 null mut: L137Q/A138Q/P139S/G143S

APOL1/1Δ null mut: P198S/G202S/G203S

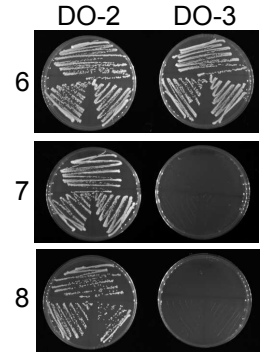

Fig. S8



**Figure S8. APOLs interactions in the Y2H system: additional features (related to Figures 4 and S7)**

- (A) Strength of interactions between APOL1 SIDs, as measured by the resistance of the complexes to increasing concentrations of 3-AT. Positive and negative controls are indicated. Numbers above the lanes at the right correspond to those in the table at the left.
- (B) Strength of interactions between SID1 and C-terminal APOL3 sequence, measured as in (A). Numbers above the lanes at the right correspond to those in the table at the left.
- (C) Trypanolytic assays involving different APOL3 and APOL1 mutants used in this work, performed as a way to check protein activity following mutagenesis (means +/- SD; n = 3).
- (D) Interactions between the 60-187 fragment of the LZ1mut mutant of APOL1 and different fragments containing SID2, all identified as strongly interacting with the 60-187 fragment of WT APOL1 in the initial cDNA library screening.
- (E) Interactions of APOL3 or APOL1 null mutants with NCS-1. Numbers in the panel at the right correspond to those in the table at the left.

A

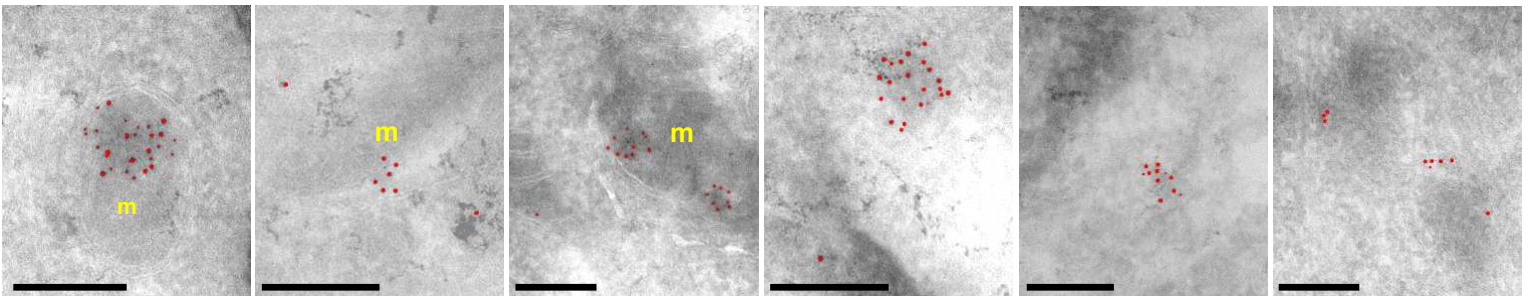

B

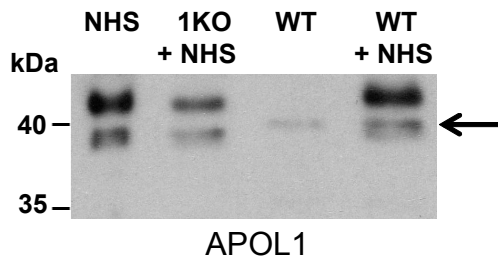

C

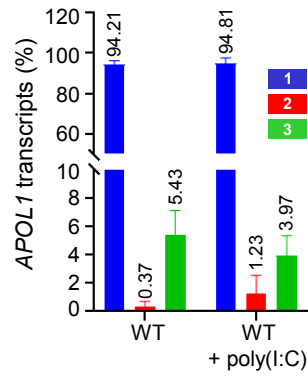

D

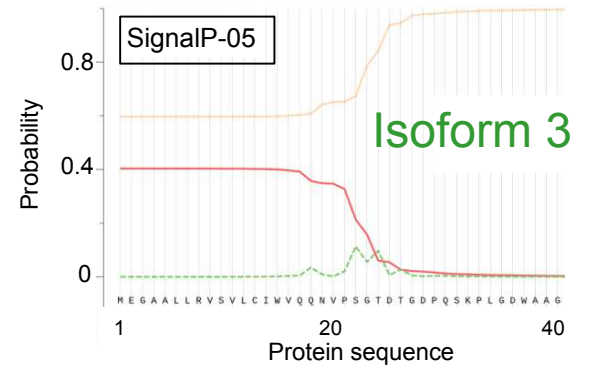

E

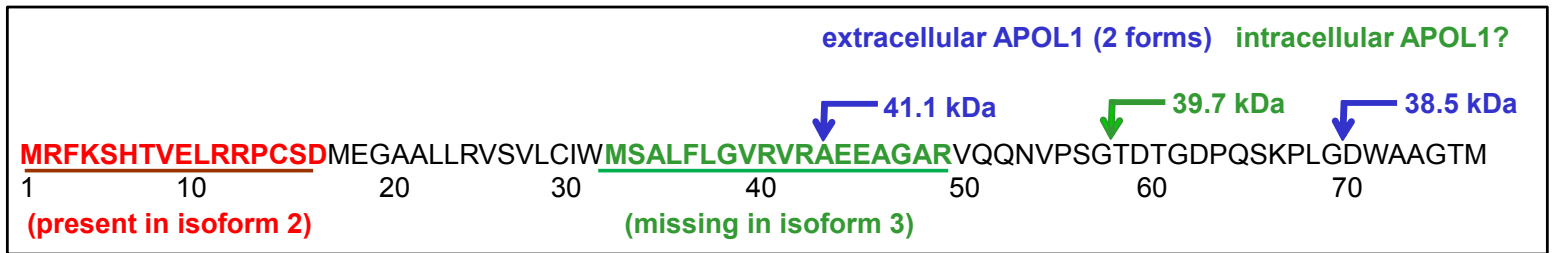

Fig. S9

**Figure S9. Characterization of intracellular APOL1 (related to Figure 5)**

(A) Immunogold detection of intracellular APOL1 in WT podocytes. Gold particles in the cytoplasm, which identify the localization of APOL1, were false-coloured in red. Control experiments on APOL1KO cells did not reveal any cytoplasmic labelling (not shown). Left panels illustrate clustered labelling close to the mitochondrion (m = mitochondrion); panels at the right exhibit cytosolic labelling. Bars = 200 nm.

(B) Western blot analysis of APOL1 in either normal human serum (NHS) (0.2  $\mu$ l) or WT podocytes extracts (10  $\mu$ g). NHS was added to extracts from either 1KO or WT podocytes to avoid any electrophoretic mobility difference linked to differential protein loading, also allowing the demonstration that intracellular APOL1 (arrow) migrates between the two APOL1 bands in NHS.

(C) qRT-PCR analysis of APOL1 isoforms (means  $\pm$ SD; n = 3).

(D) Prediction of signal peptide in APOL1 isoform 3, using the SignalP-5.0 program (Expasy).

(E) Comparison of the predicted cleavage sites in WT APOL1 (blue) or isoform 3 (green).

A

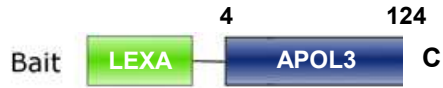

| Gene name                                  | score | SID (amino acid)                            | times found |
|--------------------------------------------|-------|---------------------------------------------|-------------|
| PSME1                                      | A     | 93-111                                      | 16          |
| BCAR1                                      | A     | 794-810                                     | 8           |
| APOL1                                      | B     | 367-392                                     | 5           |
| APOL3                                      | B     | 295-327                                     | 5           |
| CAP1                                       | B     | 15-78                                       | 6           |
| HNRNPH1                                    | B     | 36-245                                      | 6           |
| LAMB1                                      | B     | 1223-1279                                   | 3           |
| ADAMTS1                                    | C     | 205-288                                     | 3           |
| BAP1                                       | C     | 595-729                                     | 3           |
| GDI2                                       | C     | 370-445                                     | 5           |
| NOP56                                      | C     | 152-208                                     | 5           |
| SPTBN1 var1                                | C     | 287-325 / 571-605 /<br>941-1023 / 1796-1936 | 9           |
| UBAC1                                      | C     | 28-312                                      | 4           |
| WTAP                                       | C     | 1-170                                       | 3           |
| 64 preys have been identified with score D |       |                                             |             |

B

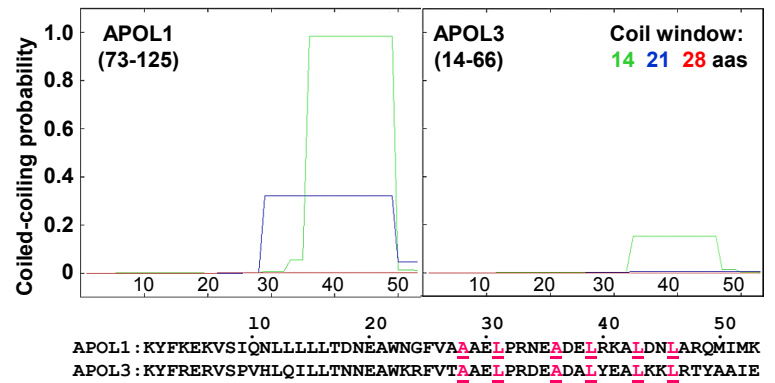

C

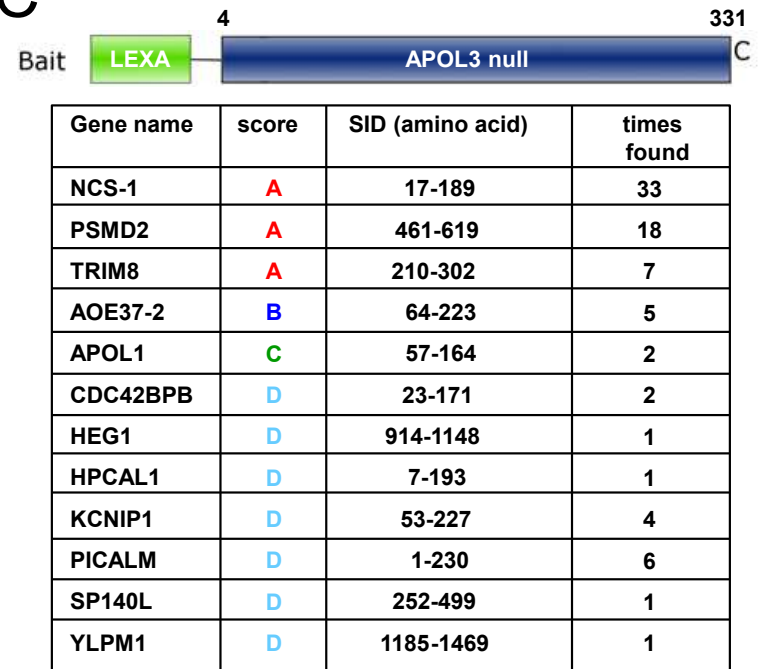

Fig. S10

**Figure S10. Y2H screening for APOL3-interacting proteins does not reveal intramolecular interaction, but identifies NCS-1 (related to Figures 4 and S7)**

- (A) Y2H screening experiment conducted with the 1-124 fragment of APOL3. 51.2 million interactions in 20 mM 3-AT were analysed. Score: A = very high, B = high, C = good and D = moderate confidence in the interaction
- (B) Evaluation of the potential of APOL1 and APOL3 N-terminal regions to form coiled-coils (COILS program, Expasy). Pink colours highlight the amino acids at positions “a” and “d” of heptad repeats in LZs (see Fig. 4).
- (C) Y2H screening experiment conducted with the complete sequence of the APOL3 null mutant (L137Q/A138Q/P139S/G143S) (Fontaine et al., 2017). 114 million interactions without 3AT were analysed. Same scores as in (A).

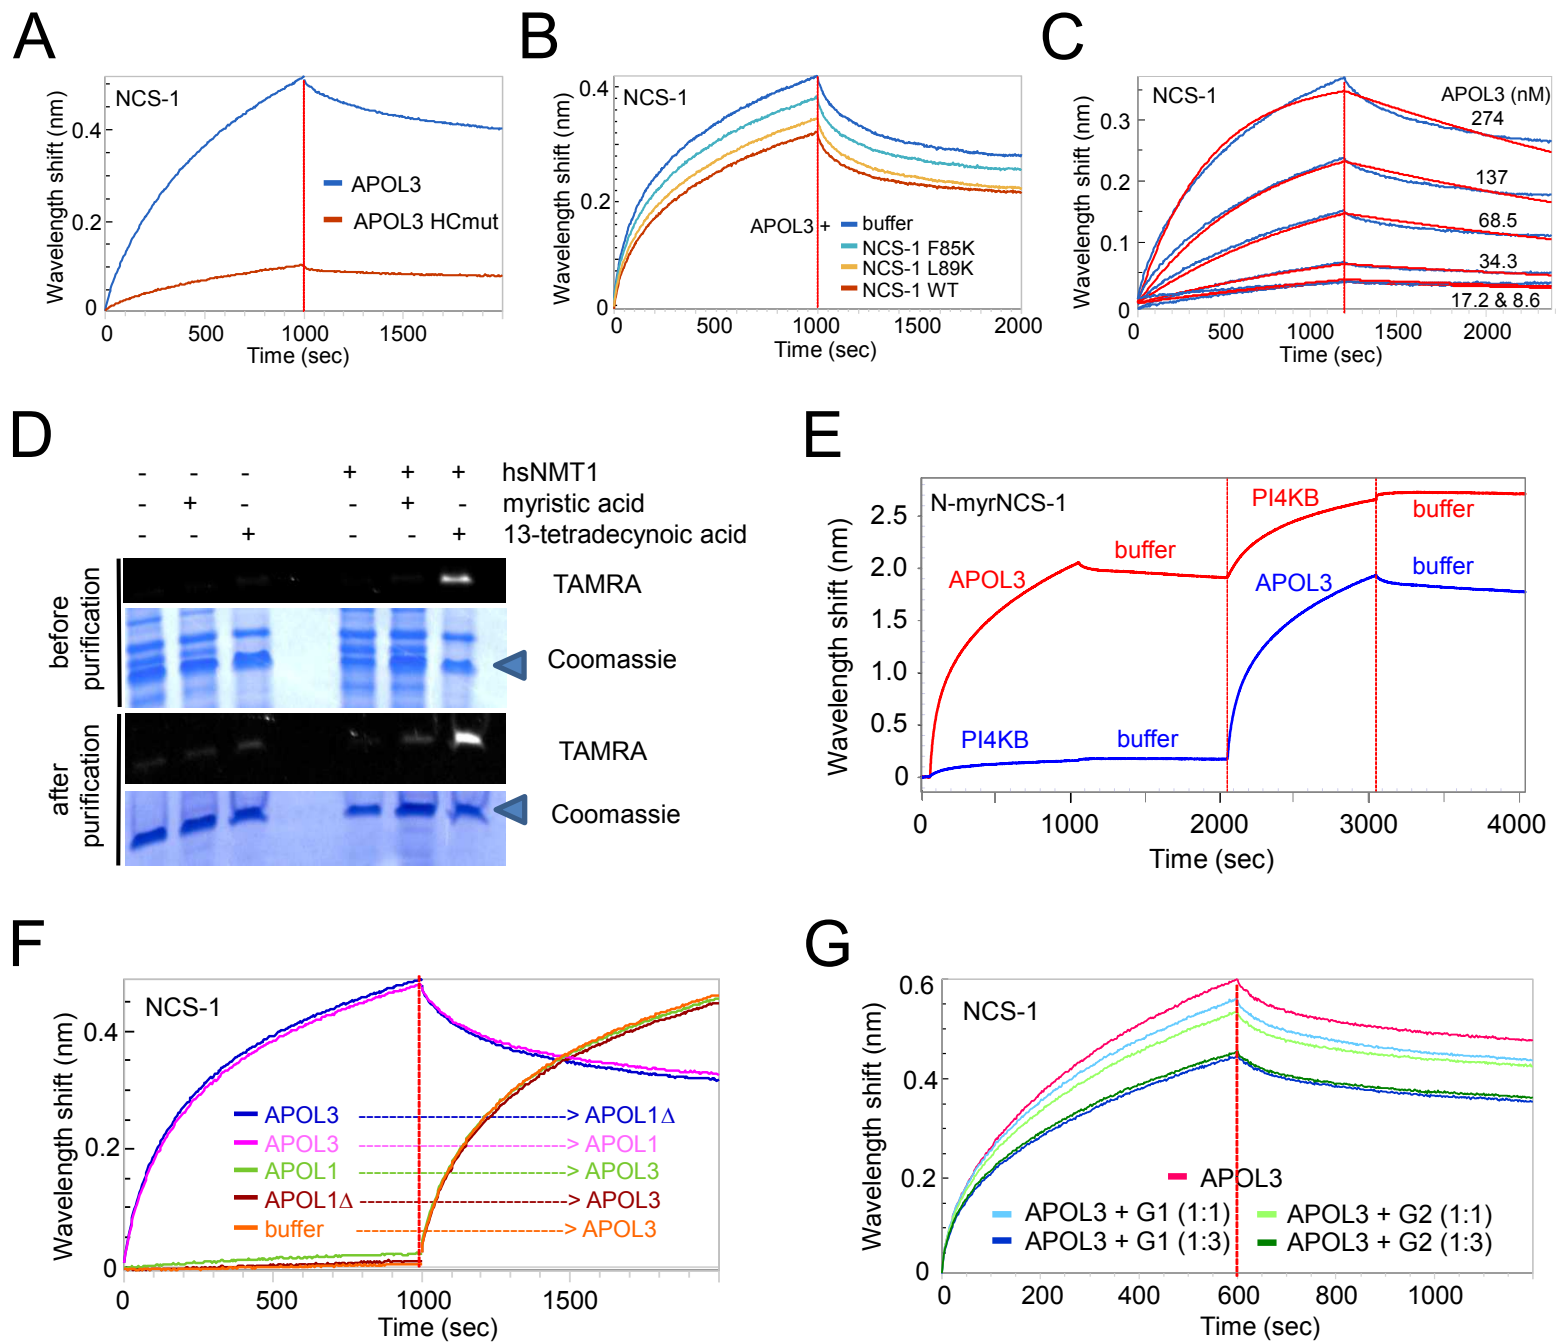

Fig. S11

**Figure S11. Binding of APOL1 variants and NCS-1 to APOL3: additional features**

**(related to Figure 5)**

- (A) BLI measurements of interaction between bound NCS-1 and APOL3 or APOL3 HC2-like mutant HCmut (n = 3).
- (B) BLI measurements of interaction between bound NCS-1 and APOL3, in the presence or not of WT or mutant NCS-1 in a molar ratio of 1:2 (APOL3 : NCS-1) (n = 3).
- (C) BLI measurements of interaction between bound NCS-1 and various concentrations of APOL3, with fitted curves (red) for determination of APOL3/NCS-1 binding affinity (n = 3).
- (D) Generation of N-myristoylated NCS-1. Recombinant NCS-1 was synthesized in *E. coli* together or not with human N-myristoyl-transferase (hsNMT1) and either myristic acid or its alkynyl analogue 13-tetradecynoic acid. Fluorescent N-myristoylated NCS-1 was detected by binding of the TAMRA fluorophore to NCS-1-bound 13-tetradecynoic acid. Coomassie blue staining allows detection of NCS-1 (arrowhead), in total *E. coli* extracts or purified recombinant protein fraction.
- (E) BLI measurements of interaction between bound N-myristoylated NCS-1 and APOL3 or PI4KB, added sequentially as indicated (n = 3).
- (F) BLI measurements of interaction between bound NCS-1 and various APOLs, added sequentially as indicated (n = 3).
- (G) BLI measurements of interaction between bound NCS-1 and APOL3, alone or with different molar ratios of G1 or G2 (n = 3).

All quantitative measurements are expressed as means +/- SD.

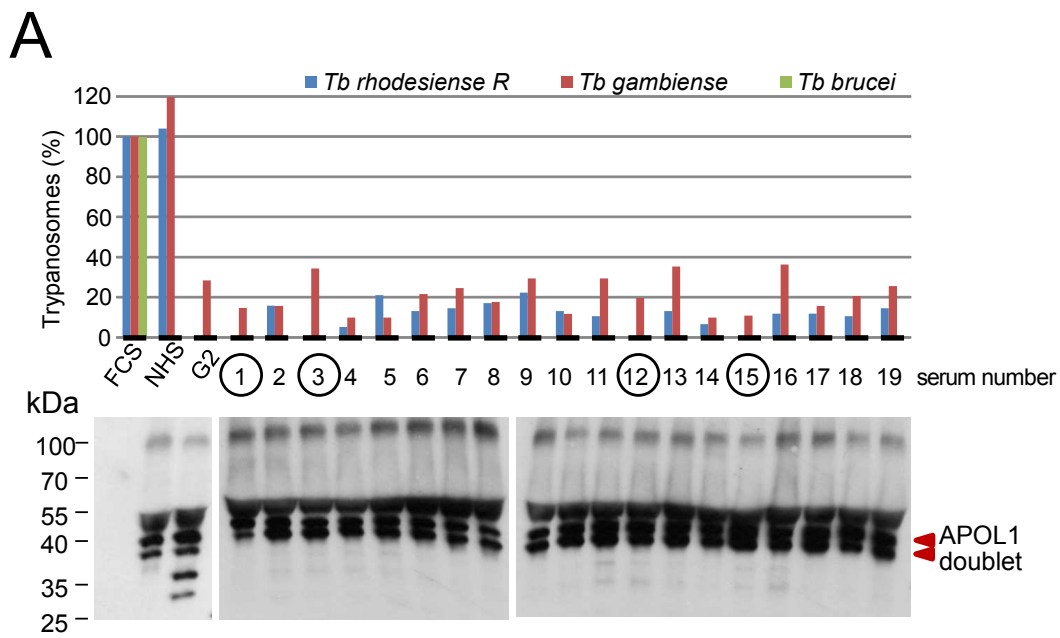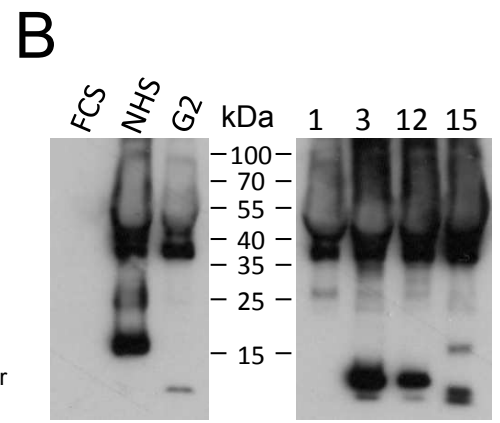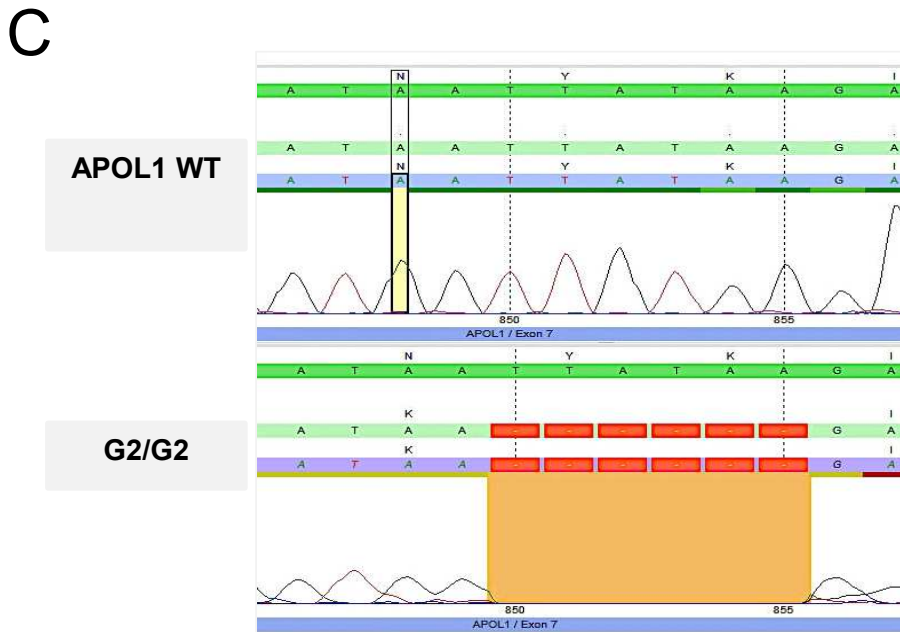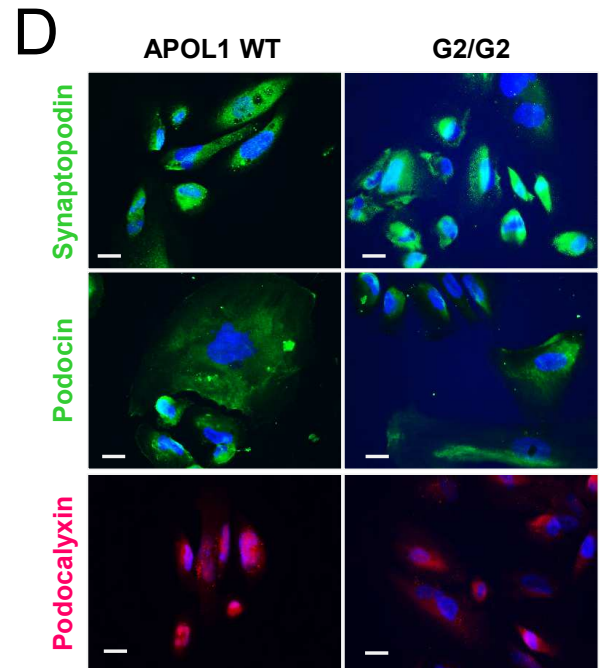

Fig. S12



**Figure S12. Generation of urine *APOL1* WT and *G2/G2* podocyte cell lines (related to Figure 7)**

- (A) Top panel: identification of WT and variant *APOL1* genotypes by trypanolytic assays of different human sera on *T. rhodesiense*, *T. gambiense* and *T. brucei*. The parasites were incubated with 20% fetal calf serum (FCS), normal human serum (NHS) or G2 human serum, and with sera from humans with various *APOL1* genotypes. The parasite growth ratio after overnight incubation is expressed as a percentage of control growth in FCS. Sera 1, 3, 12 and 15 (encircled) exhibited G1 or G2 phenotypes. Bottom panel: western blot serum analysis with anti-*APOL1*.
- (B) Western blot sera analysis with anti-haptoglobin (Hp), meant to evaluate if Hp variation could explain the relative resistance to *T. rhodesiense* (Lecordier et al., 2015)
- (C) Genotype of *APOL1* WT and *G2/G2* podocytes upon amplification of exon 7.
- (D) Immunofluorescence staining for podocyte-specific proteins synaptopodin, podocin and podocalyxin with the nuclear staining DAPI (blue). Scale bar: 50  $\mu\text{m}$ .

A

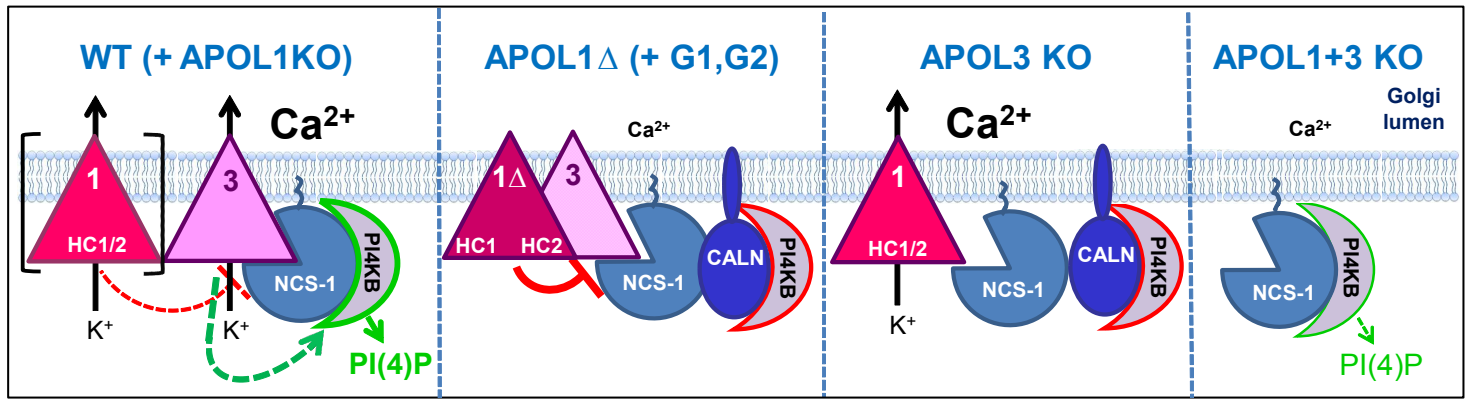

B

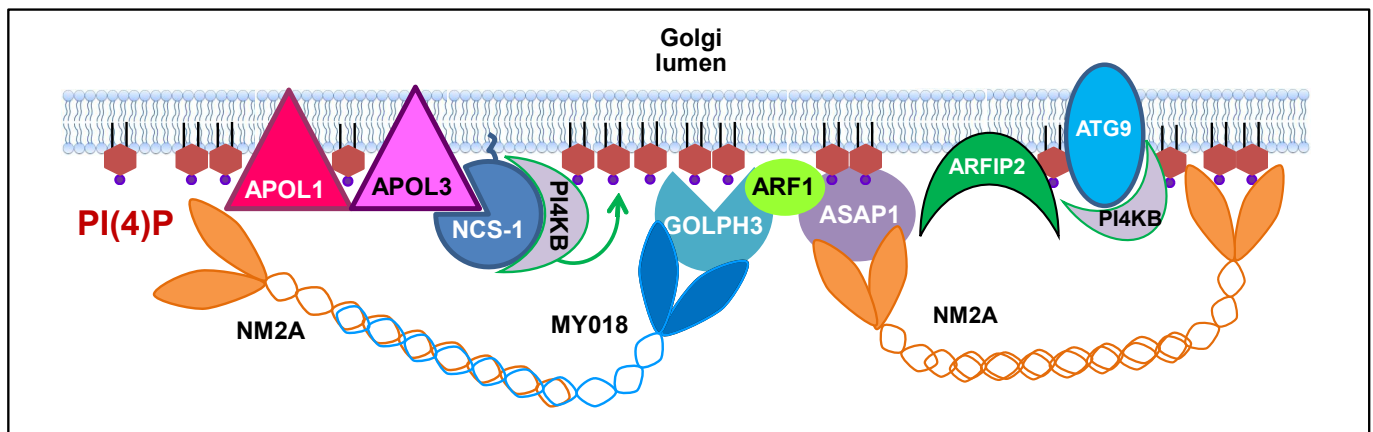

Fig. S13

**Figure S13. Control of PI4KB and actomyosin by APOLs: a model (related to all Figures)**

(A) APOL control of PI(4)P synthesis. APOL1 and APOL3 are inserted in the Golgi membrane where they can exhibit  $K^+$  channel activity. PI4KB is anchored to Golgi membranes notably through interactions with the ACBD3/giantin complex (Klima et al., 2016) and synthesizes PI(4)P that is crucial for secretion (Bishé et al., 2012; de Barry et al., 2006; Dippold et al., 2009; Haynes et al., 2005; Kuna and Field, 2019; Tokuda et al., 2014; Zhao et al., 2001). The N-myristoylated form of NCS-1 activates PI4KB through a direct interaction (Zhao et al., 2001). APOL3 interacts with NCS-1 irrespective of NCS-1 myristoylation, through  $Ca^{2+}$ -dependent hydrophobic contacts involving its C-terminal hydrophobic cluster. These contacts evoke those between the yeast NCS-1 homologue Frq1 and the PI4KB homologue Pik1 (Pandalaneni et al., 2015; Strahl et al., 2003). Whereas APOL1 or APOL1 G1/G2 variants can hinder association of APOL3 with NCS-1 (dotted or plain red line respectively), APOL1 $\Delta$  can bind to APOL3 and inactivate this protein without dissociating the APOL3/NCS-1 complex. In APOL1 $\Delta$  and APOL3KO cells where APOL3 is no longer active, PI4KB is inhibited and the level of Golgi PI(4)P is reduced. However, in the absence of both APOL1 and APOL3, PI4KB appears to be active. In addition to the control of PI4KB, APOL1 and APOL3 also influence the levels of  $Ca^{2+}$  in Golgi stores, possibly through their redundant  $K^+$  channel activity. Hypotheses attempting to explain these observations are presented in the discussion (CALN = PI4KB inhibitor calneuron).

(B) Interplay between APOLs, PI(4)P and the NM2A myosin. APOL1 and APOL3 bind to and co-localize with PI(4)P, and indirectly associate with the fission and secretion motor NM2A. Multiple pathways connect PI(4)P with NM2A. In particular, (i) the PI(4)P-binding protein GOLPH3 binds to the NM2A-interacting protein MYO18A (Billington et

al., 2015; Dippold et al., 2009; Kuna and Field, 2019; Taft et al., 2013), (ii) the phosphoinositide-binding GTPase-activating protein ASAP1 interacts with the ARF1-binder GOLPH3 and with NM2A (Chen et al., 2016; Kam et al., 2000; Rodrigues et al., 2016; Tu et al., 2012), (iii) the NM2A heavy chain MYH9 directly binds to anionic phospholipids (Liu et al., 2016), and (iv) PI4KIII $\beta$  and PI4P initiate autophagy by recruiting ATG9, ARFIP2 and NM2A at the Golgi (Judith et al., 2019). Thus, affecting Golgi PI(4)P level influences actomyosin organization, vesicular trafficking and autophagy (review in Tan and Brill, 2014).

**Table S1.****Genome sequencing of CRISPR/Cas9-generated podocyte clones (related to Fig. S3)**

## A. CRISPR/Cas9 target sites.

| Target              | Protospacer           | PAM (-NGG) |
|---------------------|-----------------------|------------|
| <i>APOL2</i>        | TGTGCTGCTGGTCTTTATCG  | TGG        |
| <i>APOL3</i> exon 5 | TAGAACATATGCAGCTATTG  | AGG        |
| <i>APOL3</i> exon 5 | AACCAGCATTGACCGATTGA  | AGG        |
| <i>APOL1</i> exon 3 | AAGTAAGCCCCTCGGTGACT  | GGG        |
| <i>APOL1</i> exon 5 | AGTGCTTTGATTTCGTACACG | AGG        |

## B. Sequencing coverage of the podocyte genomes.

|                   | WT    | 1KO   | 1Δhet | 1Δhom | 3KO   |
|-------------------|-------|-------|-------|-------|-------|
| % cov. 10x        | 98,46 | 98,60 | 97,91 | 98,28 | 98,39 |
| % cov. 20x        | 89,36 | 89,89 | 81,58 | 84,58 | 87,94 |
| % cov. 30x        | 44,71 | 50,50 | 32,16 | 36,76 | 52,77 |
| Average coverage  | 29,44 | 30,67 | 26,64 | 27,84 | 30,87 |
| St. dev. coverage | 34,97 | 36,45 | 32,88 | 34,18 | 35,88 |

C. Mutations in *APOL1* and *APOL3* detected following whole genome sequencing.

| Sample    | Gene         | Position (chr22) | cDNA position | CDS position | Type      | Modification                                                   |
|-----------|--------------|------------------|---------------|--------------|-----------|----------------------------------------------------------------|
| APOL1KO   | <i>APOL1</i> | 36257381         | 484/3017      | 210/1245     | deletion  | AC                                                             |
| APOL1KO   | <i>APOL1</i> | 36257381         | 484/3017      | 210/1245     | insertion | C                                                              |
| APOL1Δhom | <i>APOL1</i> | 36265858         | 1345/3017     | 1071/1245    | deletion  | TAAGCTTCTTTCTT<br>GTGCTGGATGTA<br>GTCTACCTCGTGT<br>ACGAATCAAAA |
| APOL1Δhom | <i>APOL1</i> | 36265893         | 1382/3017     | 1108/1245    | deletion  | GT                                                             |
| APOL1Δhom | <i>APOL1</i> | 36265895         | 1383/3017     | 1109/1245    | insertion | G                                                              |
| APOL1Δhet | <i>APOL1</i> | 36265895         | 1383/3017     | 1109/1245    | insertion | G                                                              |
| APOL1Δhet | <i>APOL1</i> | 36265895         | 1383/3017     | 1109/1245    | deletion  | GTACGA                                                         |
| APOL3KO   | <i>APOL3</i> | 36141621         | 827/2124      | 789/1209     | deletion  | A                                                              |

D. On-target and off-target homozygous (minimal 10-fold coverage) and heterozygous (minimal 20-fold coverage) SNPs with moderate or high impact.

|                          |                                                    | <b>1KO</b> | <b>1Δhom</b> | <b>1Δhet</b> | <b>3KO</b>                        |
|--------------------------|----------------------------------------------------|------------|--------------|--------------|-----------------------------------|
| <b>Homozygous SNPs</b>   | Total number of SNPs (moderate impact/high impact) | 0(0/0)     | 0(0/0)       | 3(0/0)       | 1(1/0)                            |
|                          | Genes affected by moderate or high impact SNPs     |            |              |              | HEG1 (moderate impact)            |
| <b>Heterozygous SNPs</b> | Total number of SNPs (moderate impact/high impact) | 5140(12/0) | 9133(18/1)   | 6605(21/1)   | 28007(88/4)                       |
|                          | Genes affected by high impact SNPs                 |            | ERBB3        | IGSF1        | C2orf91<br>HAAO<br>DSCAM<br>EXOC1 |

E. On-target and off-target homozygous (minimal 10-fold coverage) and heterozygous (minimal 20-fold coverage) INDELS with moderate or high impact.

|                            |                                                      | <b>1KO</b>                                     | <b>1Δhom</b>                                                                        | <b>1Δhet</b>                                                                                      | <b>3KO</b>                          |
|----------------------------|------------------------------------------------------|------------------------------------------------|-------------------------------------------------------------------------------------|---------------------------------------------------------------------------------------------------|-------------------------------------|
| <b>Homozygous INDELS</b>   | Total number of INDELS (moderate impact/high impact) | 10(0/1)                                        | 23(0/1)                                                                             | 25(0/0)                                                                                           | 21(0/1)                             |
|                            | Genes affected by moderate or high impact INDELS     | <b>APOL1</b> (high impact)                     | <b>APOL1</b> (high impact)                                                          | /                                                                                                 | <b>APOL3</b> (high impact)          |
| <b>Heterozygous INDELS</b> | Total number of INDELS (moderate impact/high impact) | 20542<br>(3/5)                                 | 15710<br>(4/9)                                                                      | 17545<br>(2/9)                                                                                    | 23781<br>(5/4)                      |
|                            | Genes affected by high impact INDELS                 | PRPF3<br>GEMIN2<br>GOLGA6L2<br>ANKRD36<br>IL32 | MED1<br>POT1<br>GOLGA6L2<br>ANKRD36<br>IL32<br>RUBCN<br>ZNF879<br>TCEB3CL<br>ZBTB10 | MED1<br>POT1<br>GOLGA6L2<br>ANKRD36<br>LINC00368<br>TCEB3CL<br>LOC63930<br><b>APOL1</b><br>GEMIN2 | MED1<br>POT1<br>GOLGA6L2<br>ANKRD36 |
